# Supplementary material
Source: MDPI journal article supplement (https://www.mdpi.com/2073-4395/12/12/3050)
Supplement: s1 [file s1 › agronomy-1944500-supplementary.pdf]

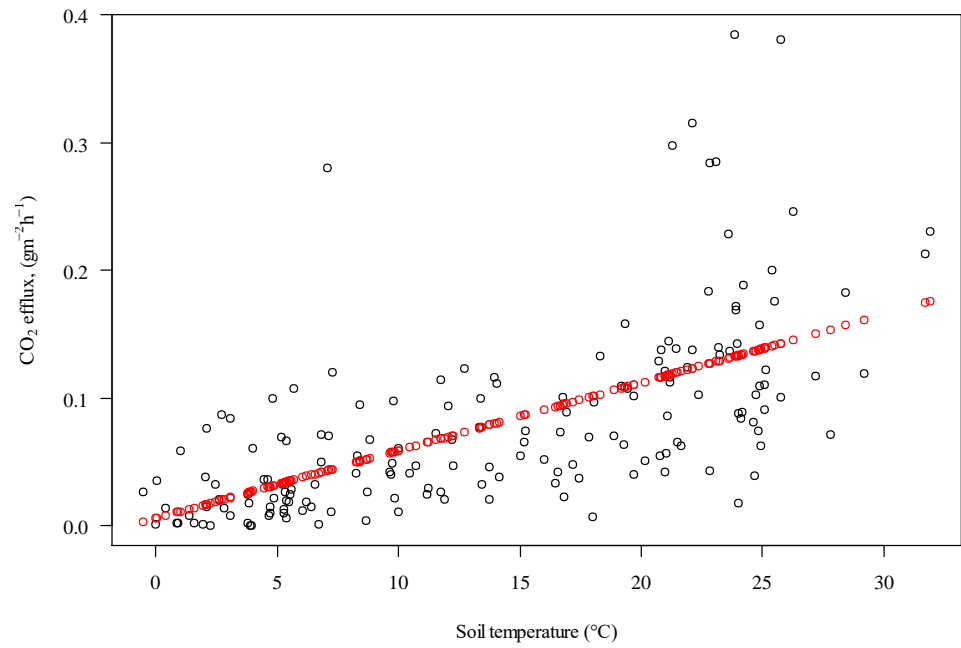

**Figure S1.** Linear model fitted to the CO<sub>2</sub> efflux (g m<sup>-2</sup> h<sup>-1</sup>) from undisturbed bare soil as a function of the soil temperature. Measured and calculated data are represented by black and red circles, respectively.

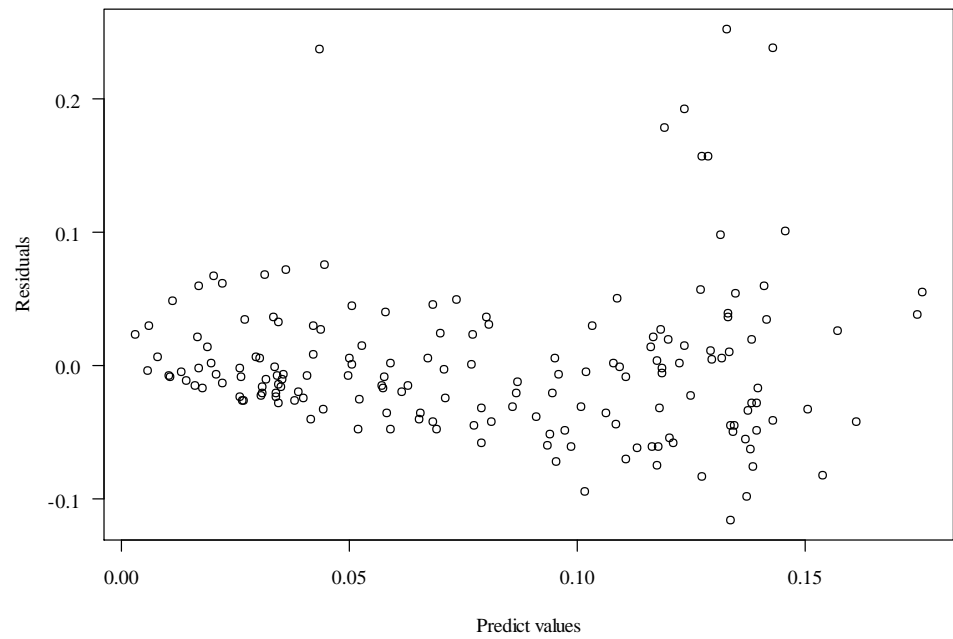

**Figure S2.** Residues in the linear model describing the CO<sub>2</sub> efflux (g m<sup>-2</sup> h<sup>-1</sup>) from undisturbed bare soil as a function of the estimated results.

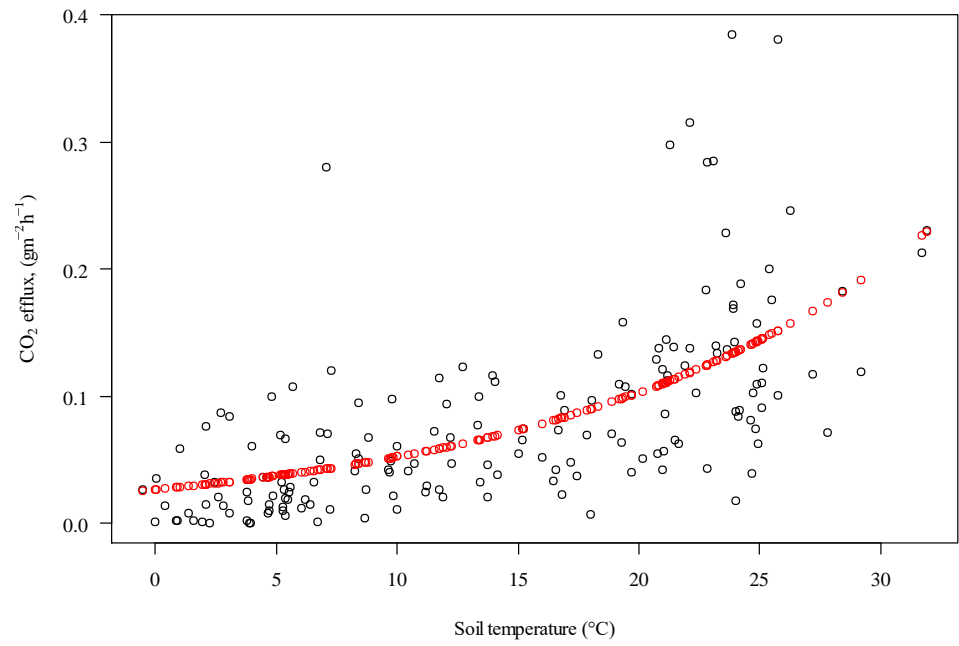

**Figure S3.** Exponential model fitted to the CO<sub>2</sub> efflux (g m<sup>-2</sup> h<sup>-1</sup>) from undisturbed bare soil as a function of the soil temperature. Measured and calculated data are represented by black and red circles, respectively.

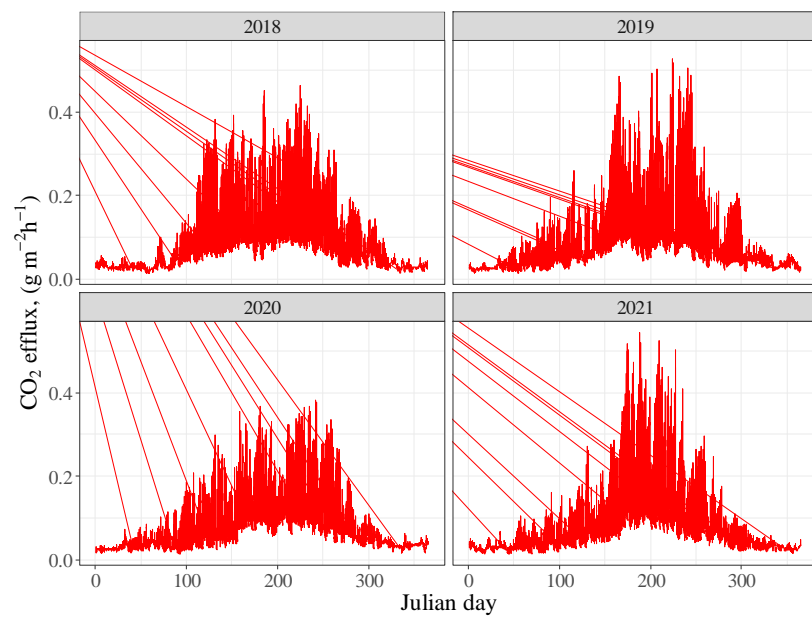

**Figure S4.** Hourly CO<sub>2</sub> efflux (g m<sup>-2</sup> h<sup>-1</sup>) of undisturbed bare soil, calculated with the exponential model with the consideration of soil temperature, for the years of 2018–2021.

**Table S1.** Mean and standard deviation of measured soil temperature, soil moisture content, and CO<sub>2</sub> efflux data by years used as inputs for model calculations.

| Parameter                                                 | 2019          | 2020          | 2021          |
|-----------------------------------------------------------|---------------|---------------|---------------|
| Soil temperature, °C                                      | 12.58±10.72   | 11.96±10.24   | 11.31±11.07   |
| Soil moisture content, %                                  | 12.79±4.94    | 9.15±4.85     | 12.96±2.99    |
| CO <sub>2</sub> efflux, g m <sup>-2</sup> h <sup>-1</sup> | 0.0845±0.0678 | 0.0774±0.0807 | 0.0716±0.0551 |
